# Supplementary material for: State-Targeted Funding and Technical Assistance to Increase Access to Medication Treatment for Opioid Use Disorder
Source: Atypon-hosted journal article supplement (doi:10.1176/appi.ps.201700196), 2017-12-15
Supplement: appi.ps.201700196.ds001.pdf [file appi.ps.201700196.ds001.pdf]

**Appendix A: Description of items measuring technical assistance provided by Single State Agencies (SSAs) to substance use disorder treatment providers**

Technical assistance provided by Single State Agencies to substance use disorder treatment providers was measured by seven items: creating information technology and/or electronic health records infrastructure; obtaining Medicaid certification; becoming in-network providers within private insurance plans; collaborating with FQHCs, including coordinating or integrating services; collaborating with other medical providers, including coordinating or integrating services; collaborating with mental health providers, including coordinating or integrating services; and providing education and/or training to increase the number of substance abuse treatment counselors.

One item measured technical assistance provided by SSAs to improve treatment programs' information technology/electronic health record infrastructure. Two items focused on providing insurance related technical assistance. SSAs reported on whether they assisted treatment programs in becoming certified by Medicaid and/or helped treatment providers gain in-network provider status in private insurance plans. Three items measured the provision of technical assistance to facilitate collaborations between treatment programs and other service providers, including Federally Qualified Health Centers, other types of medical providers (e.g., primary care physicians, specialty physicians), and mental health providers. The final item focused on workforce development and asked if SSAs provided technical assistance for education and/or training efforts to increase the supply of counselors.
